# Supplementary material for: Determining the In Vivo Efficacy of Plant-Based and Probiotic-Based Antibiotic Alternatives against Mixed Infection with Salmonella enterica and Escherichia coli in Domestic Chickens
Source: MDPI journal article supplement (doi:10.3390/vetsci10120706), 2023-12-15
Supplement: s1 [file s1]

Supplementary Table S1: Detailed composition of the pre-starter and starter feed.

| Ingredient                 | Pre-Starter | Starter |
|----------------------------|-------------|---------|
| Wheat                      | 40.0 %      | 40.0 %  |
| Soy                        | 29.2 %      | 31.2 %  |
| Corn                       | 24.8 %      | 23.8 %  |
| Sunflower seed oil         | 2.0 %       | 1.0 %   |
| Premix <sup>§</sup>        | 4.0 %       | 4.0 %   |
| Test material <sup>#</sup> | 0.1 %       | 0.1 %   |

<sup>§</sup> Szőlőfürt Szövetkezet 4% Premix

<sup>#</sup> Added “on-top” of the feed in case of group A, B and C.

Supplementary Table S2: Nutritional parameters of the pre-starter and starter feed.

| Name              | Prestarter | Starter   | Unit |
|-------------------|------------|-----------|------|
| Dry material      | 88.29      | 88.17     | %    |
| AME poultry-kcal  | 2 958.00   | 2 950.63  | Kcal |
| AME poultry-MJ    | 12.38      | 12.35     | MJ   |
| Raw protein       | 20.49      | 18.51     | %    |
| Raw fat           | 4.04       | 3.17      | %    |
| Raw fibre         | 3.17       | 2.98      | %    |
| ash               | 5.83       | 5.59      | %    |
| Lysine            | 1.18       | 1.05      | %    |
| Methionine        | 0.55       | 0.52      | %    |
| Calcium           | 0.85       | 0.83      | %    |
| Phosphor          | 0.66       | 0.65      | %    |
| P-available (avP) | 0.43       | 0.42      | %    |
| Sodium            | 0.17       | 0.17      | %    |
| Vitamin A, added  | 10 000.00  | 10 000.00 | IE   |
| Vitamin D3, added | 5 000.00   | 5 000.00  | IE   |
| Vitamin E, added  | 85.00      | 85.00     | mg   |
| Zink, added       | 100.00     | 100.00    | mg   |
| Iodine, added     | 1.30       | 1.30      | mg   |
| Manganese, added  | 120.00     | 120.00    | mg   |
| Copper, added     | 15.50      | 15.50     | mg   |
| Selenium, added   | 0.30       | 0.30      | mg   |
| Iron, added       | 45.00      | 45.00     | mg   |
| SID LYS           | 1.07       | 0.95      | %    |
| SID MET           | 0.52       | 0.49      | %    |
| SID SAA           | 0.81       | 0.76      | %    |
| SID THR           | 0.77       | 0.70      | %    |
| C18:1             | 0.81       | 0.64      | %    |
| C18:2             | 2.11       | 1.57      | %    |
| C18:3             | 0.08       | 0.07      | %    |
| LA/ALA            | 27.49      | 23.25     |      |
| 6-Phytase         | 520.00     | 520.00    | FTU  |

Supplementary Table S3: Summary of the test materials.

| Name of test material | Composition                                                                                                                   | Quantity                                                                                                  | Concentration     | Manufacturer                         |
|-----------------------|-------------------------------------------------------------------------------------------------------------------------------|-----------------------------------------------------------------------------------------------------------|-------------------|--------------------------------------|
| Test material A       | <i>Lactobacillus acidophilus</i><br><i>Lactobacillus plantarum</i><br><i>Bifidobacterium bifidum</i><br>Wheat bran<br>Corncob | 10 <sup>7</sup> CFU/g<br>10 <sup>7</sup> CFU/g<br>10 <sup>11</sup> CFU/g<br>40 %<br>Supplemented to 100 % | 1 kg/T basal diet | Non commercialized prototype product |
| Test material B       | <i>Curcuma longa</i> L.: extract<br><i>Triticum aestivum</i> germ<br><i>Cichorium intybus</i> L. root                         | 1 %<br>10 %<br>Supplemented to 100 %                                                                      | 1 kg/T basal diet | Non commercialized prototype product |
| Test material C       | <i>Trigonella Foenum graecum</i> extract<br>Copper (II) chelate of amino acid hydrate<br><i>Cichorium intybus</i> L. root     | 1 %<br>1.35 %<br>Supplemented to 100 %                                                                    | 1 kg/T basal diet | Non commercialized prototype product |

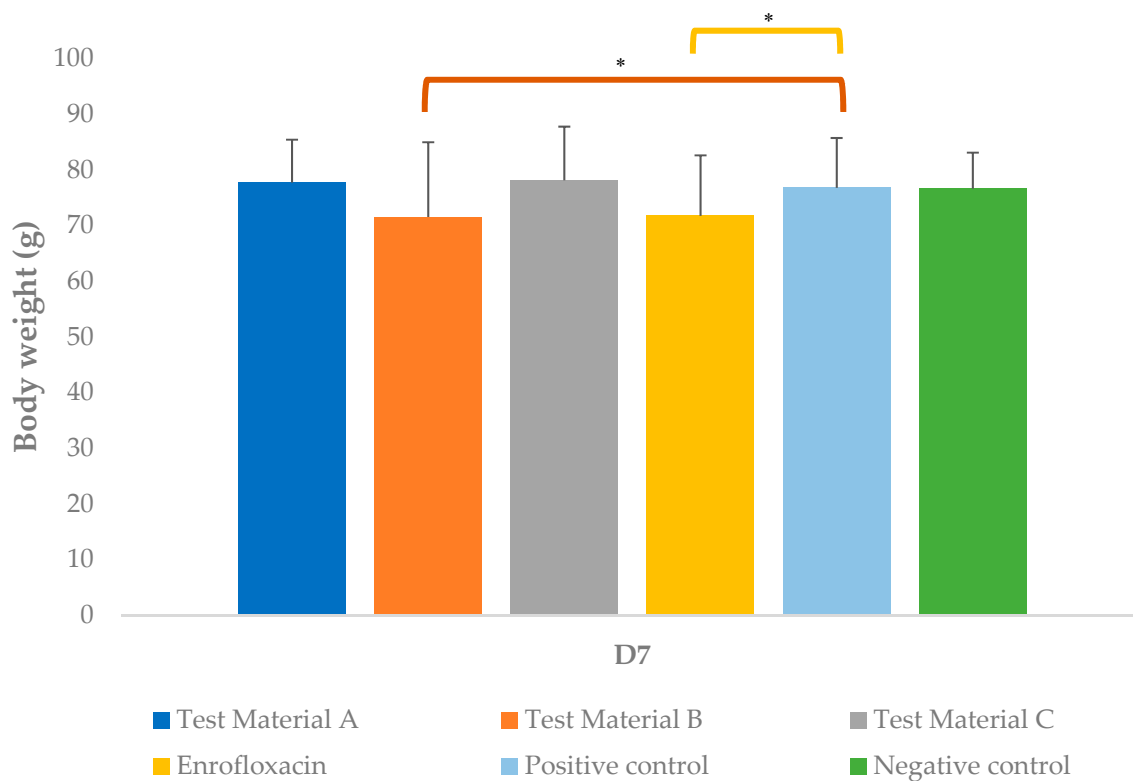

p= 0 \*\*\*; 0.001 \*\*; 0.01 \*

Supplementary Figure S1: Significant differences in the effect on measurable weight gain after infection. For body weight, we found significant differences between the positive control group and the group treated with test material B ( $p=0.0224$ ) and between the positive control group and the group treated with enrofloxacin ( $p=0.0276$ ) only immediately after infection.

Supplementary Table S4: Effect of treatments on body weight on day 7 by statistical analysis compared to positive control group.

| Positive control             | Estimate | Standard Error | t value | Pr (> t ) |     |
|------------------------------|----------|----------------|---------|-----------|-----|
| <b>(Intercept)</b>           | 80.6877  | 1.7834         | 45.244  | < 2e-16   | *** |
| Treatment [Test material A]  | 0.8914   | 2.3318         | 0.382   | 0.7028    |     |
| Treatment [Test material B]  | -5.6033  | 2.4299         | -2.306  | 0.0224    | *   |
| Treatment [Test material C]  | 1.1025   | 2.4024         | 0.459   | 0.6469    |     |
| Treatment [Enrofloxacin]     | -5.3847  | 2.3328         | -2.308  | 0.0276    | *   |
| Treatment [Negative control] | -0.1976  | 2.3116         | -0.085  | 0.9320    |     |
| Sex [Female]                 | -7.7295  | 1.3804         | -5.599  | <0.0001   | *** |

Significance codes: 0 '\*\*\*' 0.001 '\*\*' 0.01 '\*' 0.05 '.' 0.1 ' ' 1

Supplementary Table S5: Differences in villus length per treatment compared to positive and negative control groups by statistical analysis.

| Positive control             | Estimate | Standard Error | t value | Pr (> t ) |     |
|------------------------------|----------|----------------|---------|-----------|-----|
| <b>(Intercept)</b>           | 639.582  | 34.584         | 18.494  | < 2e-16   | *** |
| Treatment [Test material A]  | 20.178   | 37.865         | 0.533   | 0.59535   |     |
| Treatment [Test material B]  | 14.157   | 41.718         | 0.339   | 0.73510   |     |
| Treatment [Test material C]  | 123.058  | 41.312         | 2.979   | 0.00367   | **  |
| Treatment [Enrofloxacin]     | 51.677   | 40.183         | 1.286   | 0.20155   |     |
| Treatment [Negative control] | 94.701   | 40.078         | 2.363   | 0.02017   | *   |
| Sex [Female]                 | -5.798   | 26.268         | -0.221  | 0.82578   |     |
| Negative control             | Estimate | Standard Error | t value | Pr (> t ) |     |
| <b>(Intercept)</b>           | 734.283  | 28.170         | 26.066  | <2e-16    | *** |
| Treatment [Test material A]  | -74.523  | 40.078         | -1.859  | 0.0661    | .   |
| Treatment [Test material B]  | 28.357   | 39.751         | 0.713   | 0.4774    |     |
| Treatment [Test material C]  | -80.544  | 38.117         | -2.113  | 0.0372    | *   |
| Treatment [Enrofloxacin]     | -43.024  | 40.326         | -1.067  | 0.2887    |     |
| Treatment [Positive control] | -94.701  | 40.078         | -2.363  | 0.0202    | *   |
| Sex [Female]                 | -5.798   | 26.268         | -0.221  | 0.8258    |     |

Significance codes: 0 '\*\*\*' 0.001 '\*\*' 0.01 '\*' 0.05 '.' 0.1 ' ' 1

Supplementary Table S6: Differences in crypt depth per treatment compared to positive and negative control groups by statistical analysis.

| Positive control             | Estimate | Standard Error | t value | Pr(> t ) |     |
|------------------------------|----------|----------------|---------|----------|-----|
| (Intercept)                  | 120.5484 | 6.6839         | 18.036  | <2e-16   | *** |
| Treatment [Test material A]  | -6.6500  | 7.3179         | -0.909  | 0.36579  |     |
| Treatment [Test material B]  | 4.3958   | 8.0627         | 0.545   | 0.58690  |     |
| Treatment [Test material C]  | 23.1975  | 7.9842         | 2.905   | 0.00456  | **  |
| Treatment [Enrofloxacin]     | 1.2505   | 7.7660         | 0.161   | 0.87242  |     |
| Treatment [Negative control] | 0.4843   | 7.7457         | 0.063   | 0.95027  |     |
| Sex [Female]                 | 6.3353   | 5.0768         | 1.248   | 0.21514  |     |
| Negative control             | Estimate | Standard Error | t value | Pr(> t ) |     |
| (Intercept)                  | 121.0327 | 5.4443         | 22.231  | <2e-16   | *** |
| Treatment [Test material A]  | -7.1343  | 7.7457         | -0.921  | 0.35935  |     |
| Treatment [Test material B]  | 3.9114   | 7.3667         | 0.531   | 0.59668  |     |
| Treatment [Test material C]  | 22.7132  | 7.6826         | 2.956   | 0.00393  | **  |
| Treatment [Enrofloxacin]     | 0.7661   | 7.7936         | 0.098   | 0.92190  |     |
| Treatment [Positive control] | -0.4843  | 7.7457         | -0.063  | 0.95027  |     |
| Sex [Female]                 | 6.3353   | 5.0768         | 1.248   | 0.21514  |     |

Significance codes: 0 '\*\*\*' 0.001 '\*\*' 0.01 '\*' 0.05 '.' 0.1 ' ' 1

Supplementary Table S7: Differences in villus width per treatment compared to positive and negative control groups by statistical analysis.

| Positive control             | Estimate | Standard Error | t value | Pr(> t ) |     |
|------------------------------|----------|----------------|---------|----------|-----|
| (Intercept)                  | 109.368  | 6.409          | 17.066  | <2e-16   | *** |
| Treatment [Test material A]  | -15.700  | 7.016          | -2.238  | 0.0276   | *   |
| Treatment [Test material B]  | -7.087   | 7.731          | -0.917  | 0.3616   |     |
| Treatment [Test material C]  | -10.619  | 7.655          | -1.387  | 0.1686   |     |
| Treatment [Enrofloxacin]     | -0.715   | 7.446          | -0.096  | 0.9237   |     |
| Treatment [Negative control] | -12.333  | 7.426          | -1.661  | 0.1001   |     |
| Sex [Female]                 | 1.045    | 4.868          | 0.215   | 0.8304   |     |

Significance codes: 0 '\*\*\*' 0.001 '\*\*' 0.01 '\*' 0.05 '.' 0.1 ' ' 1
